# Supplementary material for: Efficacy of repetitive transcranial magnetic stimulation in Parkinson's disease: A systematic review and meta-analysis of randomised controlled trials
Source: PubMed Central journal article supplement — eClinicalMedicine. 2022 Jul 29;52:101589. doi: 10.1016/j.eclinm.2022.101589 (PMC9340539; doi:10.1016/j.eclinm.2022.101589), 2022-07-29

**eFigure 1**

**A**

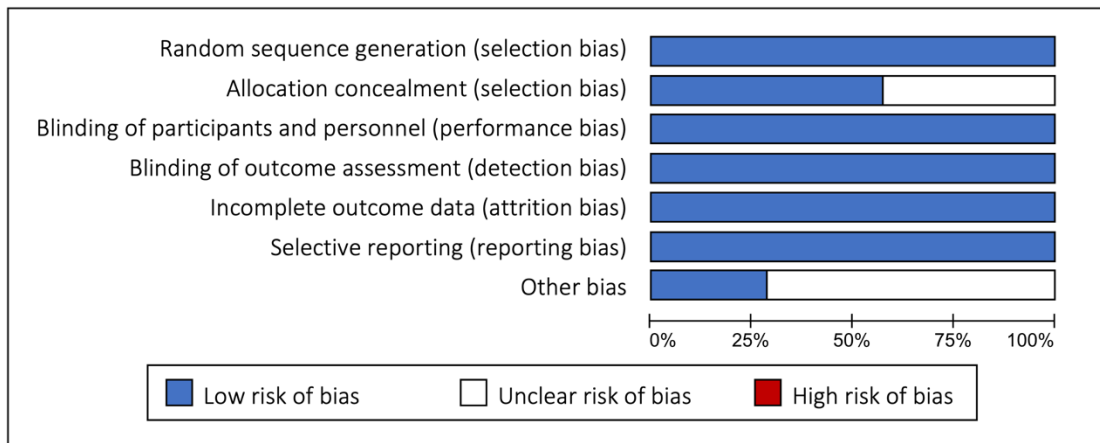

**B**

|                         | (I) | (II) | (III) | (IV) | (V) | (VI) | (VII) |
|-------------------------|-----|------|-------|------|-----|------|-------|
| Benninger et al. (2012) | +   | ?    | +     | +    | +   | +    | ?     |
| Brys et al. (2016)      | +   | +    | +     | +    | +   | +    | ?     |
| Buard et al. (2018)     | +   | +    | +     | +    | +   | +    | +     |
| Chung et al. (2020)     | +   | +    | +     | +    | +   | +    | ?     |
| Cohen et al. (2018)     | +   | ?    | +     | +    | +   | +    | ?     |
| Filipović et al (2010)  | +   | ?    | +     | +    | +   | +    | ?     |
| Khedr et al. (2019)     | +   | +    | +     | +    | +   | +    | ?     |
| Kim et al. (2015)       | +   | ?    | +     | +    | +   | +    | ?     |
| Li et al. (2020)        | +   | +    | +     | +    | +   | +    | ?     |
| Makkos et al. (2016)    | +   | ?    | +     | +    | +   | +    | ?     |
| Maruo et al. (2013)     | +   | ?    | +     | +    | +   | +    | ?     |
| Mi et al. (2019)        | +   | +    | +     | +    | +   | +    | +     |
| Pal et al. (2010)       | +   | +    | +     | +    | +   | +    | +     |
| Yokoe et al. (2017)     | +   | +    | +     | +    | +   | +    | +     |

**Risk of bias:**

(I) Random sequence generation (selection bias)  
 (II) Allocation concealment (selection bias)  
 (III) Blinding of participants and personnel (performance bias)  
 (IV) Blinding of outcome assessment (detection bias)  
 (V) Incomplete outcome data (attrition bias)  
 (VI) Selective reporting (reporting bias)  
 (VII) Other bias

**Key:**  
 "+" = Low risk of bias  
 "?" = Unclear risk of bias  
 "-" = High risk of bias

eFigure 2

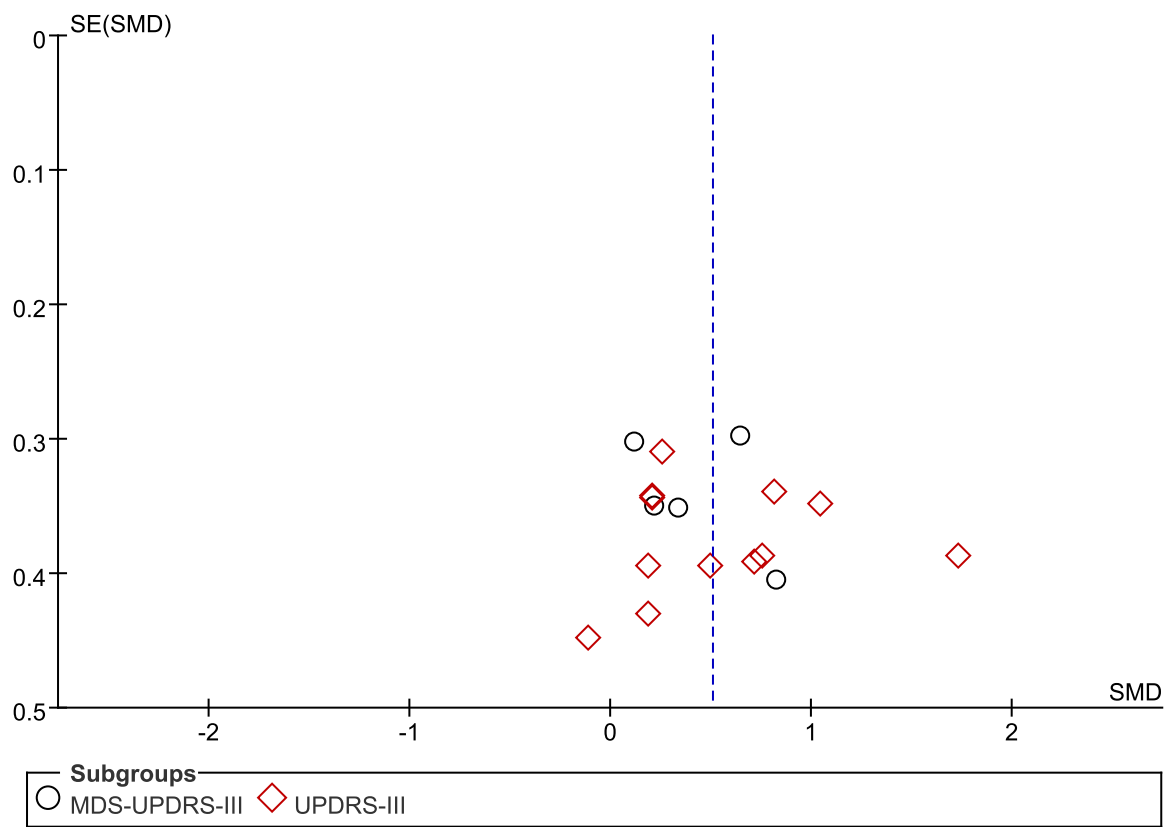

**eFigure 3**

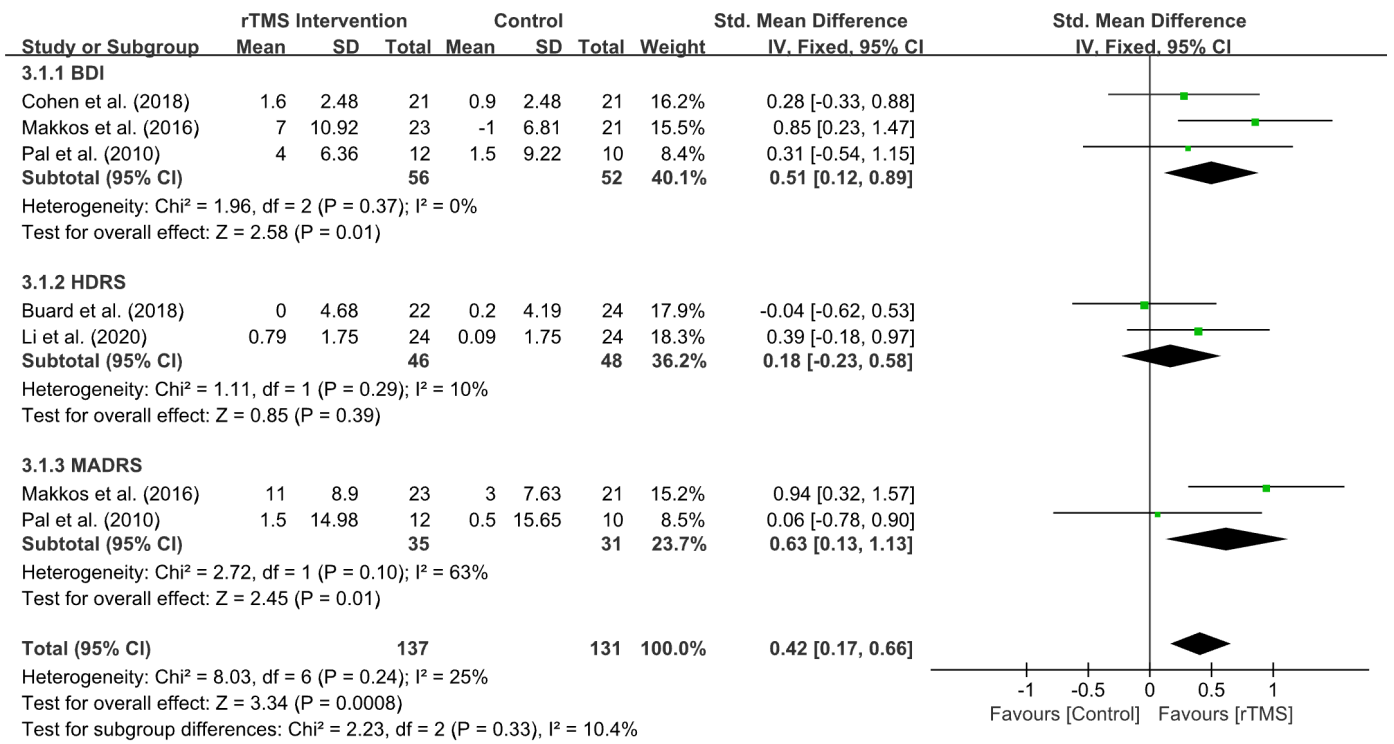

Supplement: mmc1.pdf [file mmc1.pdf]
